# Supplementary material for: Self-Initiated Butyl Acrylate Polymerizations in Bulk and in Solution Monitored By In-Line Techniques
Source: MDPI journal article supplement (doi:10.3390/polym13122021), 2021-06-21
Supplement: s1 [file s1]

## Supporting Information

### Self-initiated butyl acrylate polymerizations in bulk and in solution monitored by in-line techniques

Jonas Mätzig, Marco Drache, Sabine Beuermann

Clausthal University of Technology, Institute of Technical Chemistry,  
Arnold-Sommerfeld-Straße 4, 38678 Clausthal-Zellerfeld, Germany

Table S1: Experimental details for bulk polymerizations.

| $T / ^\circ\text{C}$ | $m_{\text{BA}} /$<br>mg | $\rho_{\text{BA}}^{[1]} /$<br>( $\text{g}\cdot\text{cm}^{-3}$ ) | $\rho_{\text{Poly(BA)}}^{[1]} /$<br>( $\text{g}\cdot\text{cm}^{-3}$ ) | $I / \text{J}$ | $x$   | $t (x=0.9) /$<br>s |
|----------------------|-------------------------|-----------------------------------------------------------------|-----------------------------------------------------------------------|----------------|-------|--------------------|
| 80                   | 18.431                  | 0.836                                                           | 0.984                                                                 | 11.45          | 0.997 | 12720              |
| 90                   | 13.375                  | 0.826                                                           | 0.973                                                                 | 7.875          | 0.945 | 7950               |
| 100                  | 13.708                  | 0.816                                                           | 0.962                                                                 | 8.382          | 0.982 | 4590               |
| 110                  | 17.217                  | 0.805                                                           | 0.951                                                                 | 10.28          | 0.959 | 3524               |
| 120                  | 12.357                  | 0.795                                                           | 0.940                                                                 | 7.277          | 0.945 | 3200               |
| 130                  | 12.036                  | 0.785                                                           | 0.929                                                                 | 6.976          | 0.928 | 1410               |

Final monomer conversion at the end of the reaction,  $x$ , for bulk polymerizations with in-line DSC measurement at the indicated temperature,  $T$ , with the initial BA mass,  $m_{\text{BA}}$ , the time required for 90 % conversion,  $t (x=0.9)$ , and the integral,  $I$ , of the exothermic DSC peak.

- [1] Baruido, I.; Févotte, G. McKenna T.F. Density data for copolymer systems: butyl acrylate/vinyl acetate homo- and copolymerization in ethyl acetate, *Eur. Polym. J.* **1999**, 35, 775-780, 10.1016/S0014-3057(98)00070-6.

Table S2: List of reaction conditions of all polymerizations carried out in solution with dioxane.  $M_p$  refers to the molar mass of the main peak of the molar mass distribution,  $M_n$  is the number average molar mass,  $D$  the dispersity,  $T$  the temperature,  $t$  reaction time,  $c_{BA}$  the initial monomer concentration and  $x_{BA}$  the initial molar ratio of monomer.

| $x_{BA}$ | $c_{BA,0} / (\text{mol} \cdot \text{L}^{-1})$ | $T / ^\circ\text{C}$ | $t / \text{min}$ | $M_n / (\text{g} \cdot \text{mol}^{-1})$ | $M_p / (\text{g} \cdot \text{mol}^{-1})$ | $D$  |
|----------|-----------------------------------------------|----------------------|------------------|------------------------------------------|------------------------------------------|------|
| 0.20     | 2.06                                          | 120                  | 60               | $4.93 \cdot 10^3$                        | $3.21 \cdot 10^4$                        | 5.0  |
| 0.30     | 2.92                                          | 120                  | 60               | $7.03 \cdot 10^3$                        | $4.85 \cdot 10^4$                        | 6.3  |
| 0.40     | 3.69                                          | 120                  | 60               | $9.52 \cdot 10^4$                        | $7.43 \cdot 10^4$                        | 8.5  |
| 0.50     | 4.39                                          | 120                  | 60               | $9.88 \cdot 10^3$                        | $9.18 \cdot 10^4$                        | 10.8 |
| 0.20     | 2.06                                          | 130                  | 60               | $3.72 \cdot 10^3$                        | $1.74 \cdot 10^4$                        | 4.7  |
| 0.30     | 2.92                                          | 130                  | 60               | $5.96 \cdot 10^3$                        | $4.24 \cdot 10^4$                        | 6.3  |
| 0.40     | 3.69                                          | 130                  | 60               | $6.62 \cdot 10^3$                        | $5.40 \cdot 10^4$                        | 7.9  |
| 0.50     | 4.39                                          | 130                  | 60               | $1.07 \cdot 10^4$                        | $7.13 \cdot 10^4$                        | 7.1  |
| 0.20     | 2.06                                          | 140                  | 60               | $3.21 \cdot 10^3$                        | $1.36 \cdot 10^4$                        | 4.4  |
| 0.30     | 2.92                                          | 140                  | 60               | $4.51 \cdot 10^3$                        | $3.30 \cdot 10^4$                        | 5.7  |
| 0.40     | 3.69                                          | 140                  | 60               | $5.79 \cdot 10^3$                        | $4.22 \cdot 10^4$                        | 6.1  |
| 0.50     | 4.39                                          | 140                  | 60               | $6.46 \cdot 10^3$                        | $5.20 \cdot 10^4$                        | 7.2  |
| 0.10     | 1.10                                          | 150                  | 30               | $1.81 \cdot 10^3$                        | $3.47 \cdot 10^3$                        | 2.7  |
| 0.20     | 2.06                                          | 150                  | 30               | $2.58 \cdot 10^3$                        | $1.03 \cdot 10^4$                        | 3.7  |
| 0.30     | 2.92                                          | 150                  | 30               | $3.15 \cdot 10^3$                        | $1.46 \cdot 10^4$                        | 4.2  |
| 0.40     | 3.69                                          | 150                  | 30               | $4.07 \cdot 10^3$                        | $3.26 \cdot 10^4$                        | 5.6  |
| 0.10     | 1.10                                          | 160                  | 30               | $1.81 \cdot 10^3$                        | $2.27 \cdot 10^3$                        | 4.7  |
| 0.20     | 2.06                                          | 160                  | 10               | $2.10 \cdot 10^3$                        | $6.06 \cdot 10^3$                        | 3.3  |
| 0.30     | 2.92                                          | 160                  | 10               | $2.89 \cdot 10^3$                        | $1.23 \cdot 10^4$                        | 3.9  |
| 0.40     | 3.69                                          | 160                  | 10               | $3.78 \cdot 10^3$                        | $1.75 \cdot 10^4$                        | 4.8  |
| 0.10     | 1.10                                          | 170                  | 30               | $1.46 \cdot 10^3$                        | $2.04 \cdot 10^3$                        | 3.1  |
| 0.20     | 2.06                                          | 170                  | 10               | $1.83 \cdot 10^3$                        | $3.46 \cdot 10^3$                        | 2.8  |
| 0.30     | 2.92                                          | 170                  | 10               | $2.25 \cdot 10^3$                        | $7.16 \cdot 10^3$                        | 3.5  |
| 0.40     | 3.69                                          | 170                  | 10               | $2.90 \cdot 10^3$                        | $1.33 \cdot 10^4$                        | 4.4  |
| 0.10     | 1.10                                          | 180                  | 30               | $1.32 \cdot 10^3$                        | $1.71 \cdot 10^3$                        | 1.7  |
| 0.20     | 2.06                                          | 180                  | 10               | $1.91 \cdot 10^3$                        | $3.21 \cdot 10^3$                        | 2.3  |
| 0.30     | 2.92                                          | 180                  | 10               | $1.95 \cdot 10^3$                        | $4.24 \cdot 10^3$                        | 3.4  |
| 0.40     | 3.69                                          | 180                  | 10               | $2.53 \cdot 10^3$                        | $9.75 \cdot 10^3$                        | 4.0  |

Table S3: Reaction conditions of polymerizations carried out in solution with different solvents, including dioxane for comparison.  $M_p$  refers to the molar mass of the main peak of the molar mass distribution,  $M_n$  is the number average molar mass,  $D$  the dispersity,  $T$  the temperature,  $t$  reaction time,  $c_{BA}$  the initial monomer concentration and  $x_{BA}$  the molar ratio of monomer.

| solvent    | $x_{BA}$ | $c_{BA,0} / (\text{mol} \cdot \text{L}^{-1})$ | $T / ^\circ\text{C}$ | $t / \text{min}$ | $M_n / (\text{g} \cdot \text{mol}^{-1})$ | $M_p / (\text{g} \cdot \text{mol}^{-1})$ | $D$ |
|------------|----------|-----------------------------------------------|----------------------|------------------|------------------------------------------|------------------------------------------|-----|
| dioxane    | 0.50     | 4.39                                          | 130                  | 60               | $1.07 \cdot 10^4$                        | $7.13 \cdot 10^4$                        | 7.1 |
| 2-octanone | 0.50     | 3.35                                          | 130                  | 60               | $9.11 \cdot 10^3$                        | $5.62 \cdot 10^4$                        | 6.1 |
| mesitylene | 0.50     | 3.56                                          | 130                  | 60               | $8.03 \cdot 10^3$                        | $4.42 \cdot 10^4$                        | 5.2 |
| xylene     | 0.50     | 3.76                                          | 130                  | 60               | $7.75 \cdot 10^3$                        | $4.95 \cdot 10^4$                        | 6.0 |
| toluene    | 0.50     | 4.03                                          | 130                  | 60               | $1.02 \cdot 10^4$                        | $7.22 \cdot 10^4$                        | 7.7 |
